# Supplementary material
Source: publisher figshare collection journal article supplement (https://tandf.figshare.com/ndownloader/files/17937038)
Supplement: Supplementary file 1 [file 17937038]

| Top 50 flood sensitive words during Houston Flood with their sensitivity score | |
| --- | --- |
| Flood sensitive words |  |
| raining | 199.8 |
| warning | 197.3 |
| prayforTexas | 196.3 |
| Ck | 195.4 |
| Houstonflood | 192.1 |
| Tornado | 190.2 |
| HarveyStrong | 189.5 |
| affecting | 181.2 |
| boot | 174.3 |
| Cypress | 160.4 |
| drown | 141.1 |
| boat | 139.0 |
| HurricaneHarvey | 127.8 |
| safe | 126.6 |
| helicopter | 124.1 |
| Katrina | 123.8 |
| evacuation | 122.8 |
| rain | 121.0 |
| Lakewood | 117.0 |
| Houstonians | 109.9 |
| alerts | 101.1 |
| rescue | 99.8 |
| flooding | 94.5 |
| evacuating | 93.5 |
| water | 89.7 |
| shelter | 88.5 |
| electricity | 85.2 |
| catastrophic | 79.2 |
| tropical | 78.7 |
| floating | 76.1 |
| reservoir | 72.8 |
| flash | 71.5 |
| roads | 71.2 |
| help | 69.8 |
| pray | 69.1 |
| drowning | 69.0 |
| elderly | 68.1 |
| freeway | 67.2 |
| highway | 64.8 |
| flooded | 63.9 |
| stuck | 63.6 |
| storm | 63.1 |
| emergency | 62.3 |
| donate | 61.2 |
| GameOfThrones | 60.9 |
| helpless | 59.4 |
| stay | 58.4 |
| Baytown | 58.2 |
| thunder | 56.9 |
| flooded | 54.3 |
